# Supplementary material
Source: PubMed Central journal article supplement (PMC6857086)

# Supplementary Figure 1

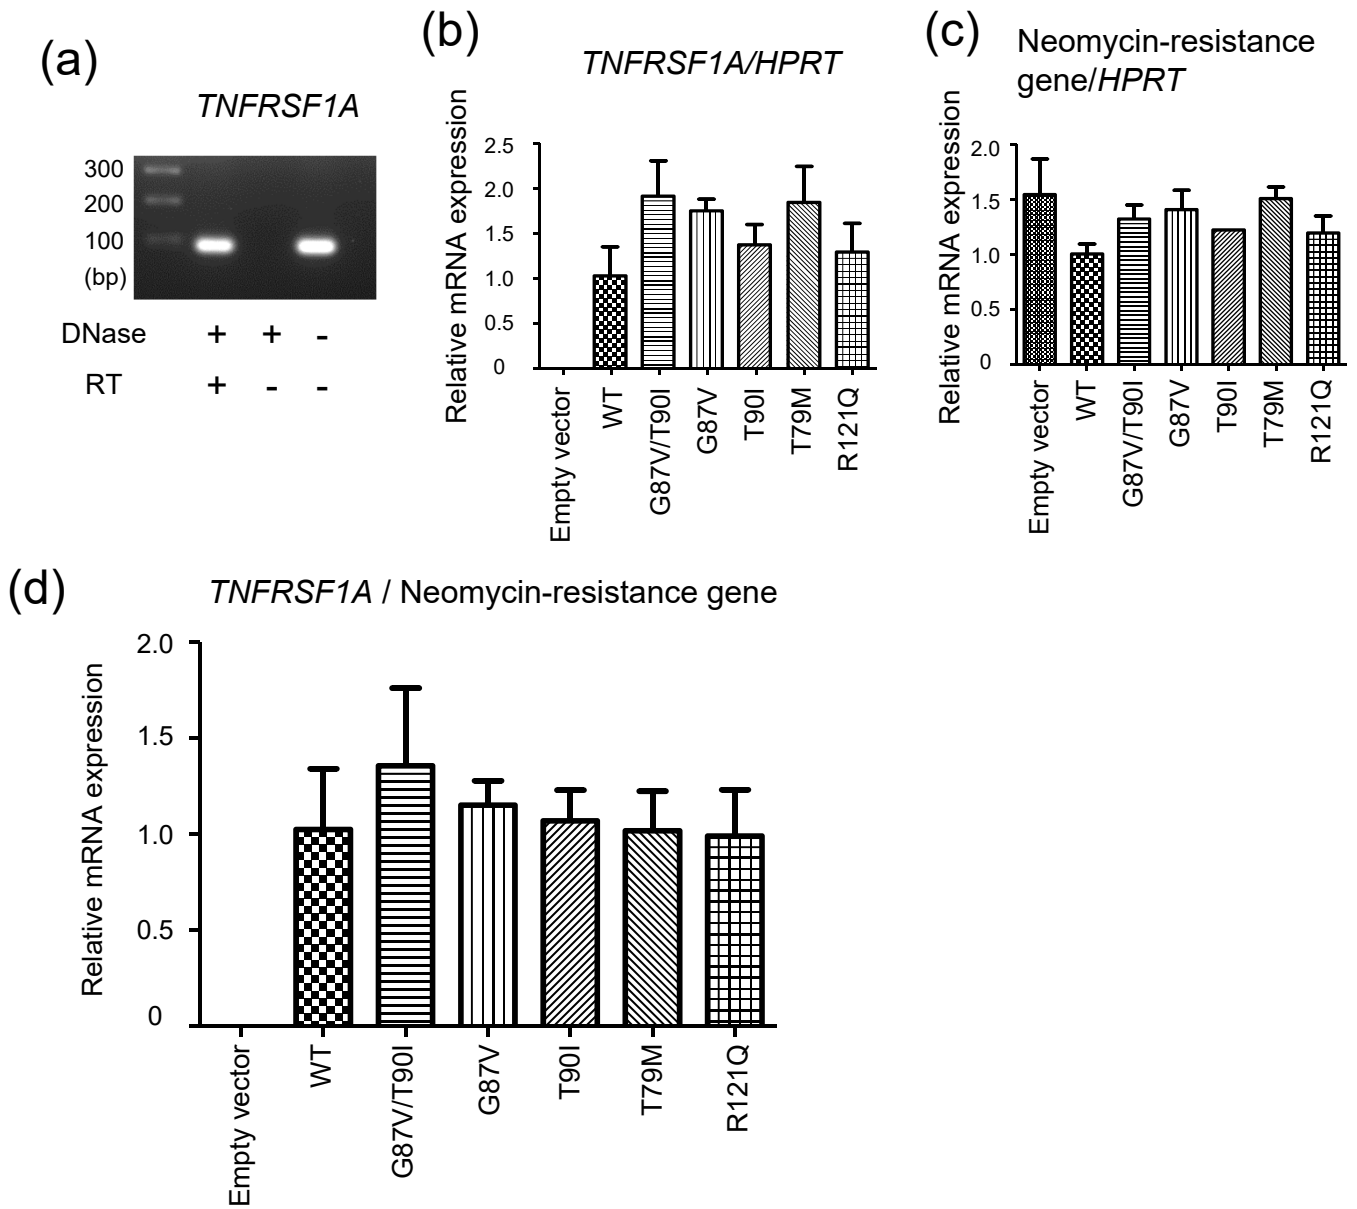

Supplement: CEI-198-416-s001.pdf [file CEI-198-416-s001.pdf]

## Supplementary Figure 2

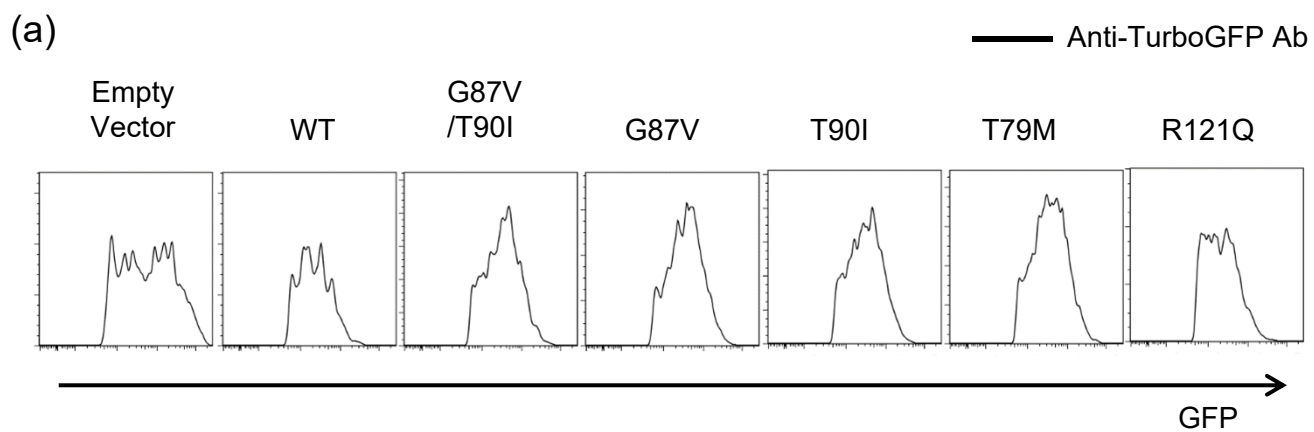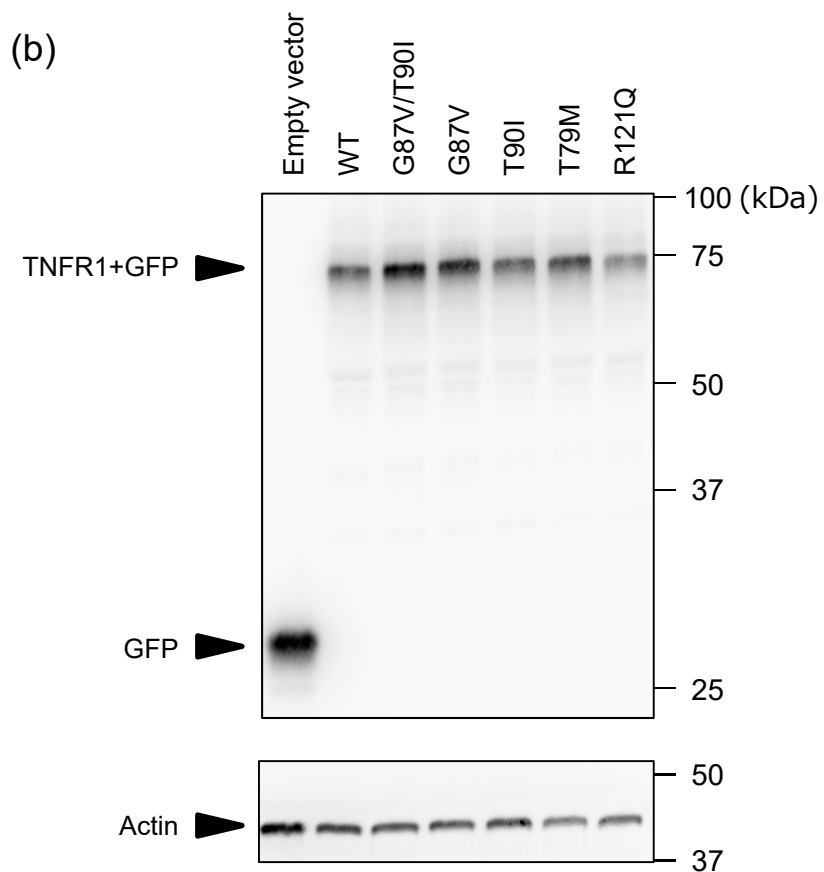

Supplement: CEI-198-416-s002.pdf [file CEI-198-416-s002.pdf]

# Supplementary Figure 3

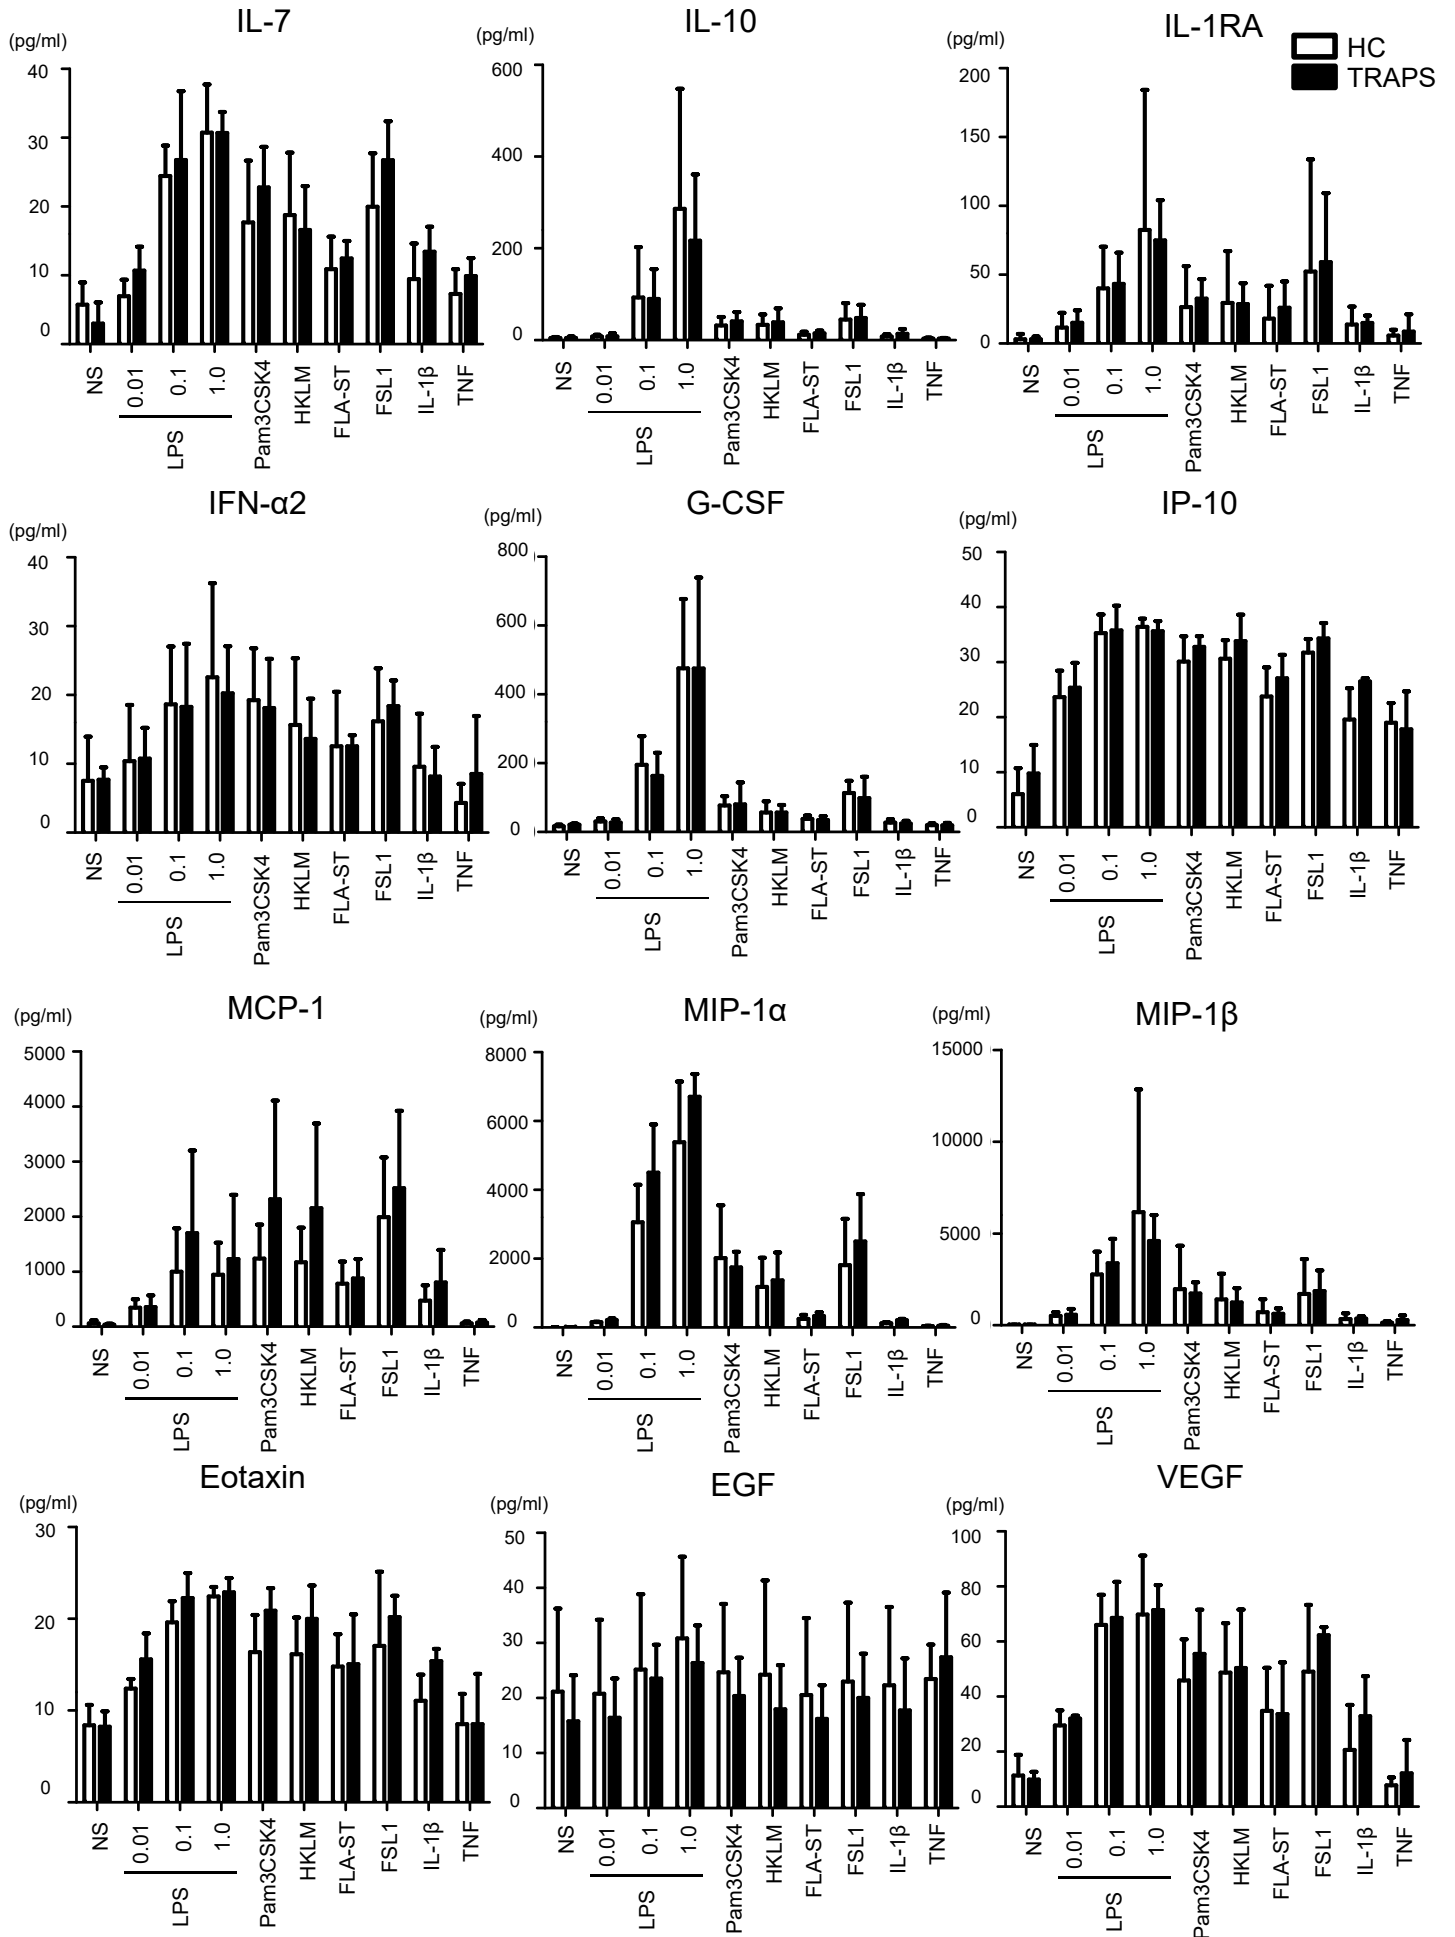

Supplement: CEI-198-416-s003.pdf [file CEI-198-416-s003.pdf]
